# Supplementary material for: Questionnaire survey of the pan-African trade in lion body parts
Source: PLOS journal article supplement (doi:10.1371/journal.pone.0187060), 2017-10-26
Supplement: S6 (10.1371/journal.pone.0187060.s006) [file journal.pone.0187060.s006]

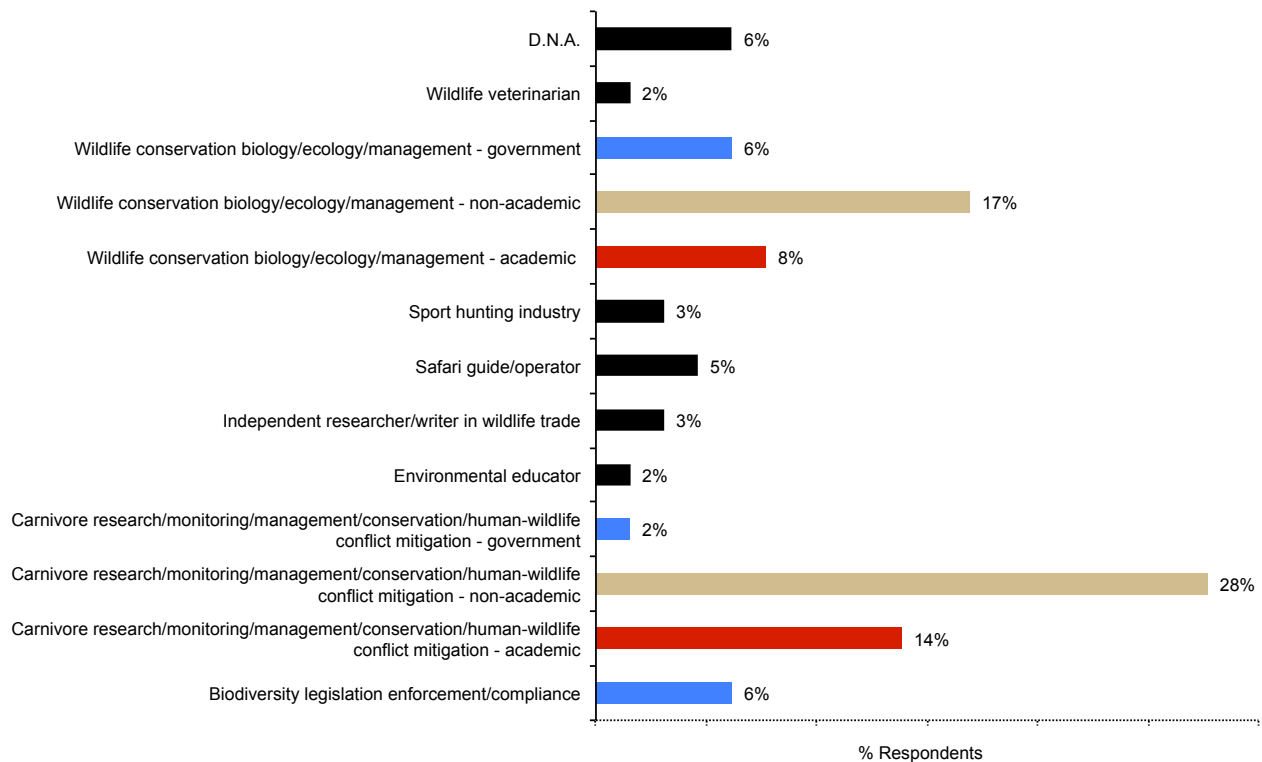

**S2 Fig.** Respondents' area of expertise and/or occupation and/or type of employment (Survey question 5) (D.N.A. = Did Not Answer) (Bars in blue, beige and red show that respondents worked for government, non-academic and academic institutions respectively)
